# Supplementary material for: Genetic Determinants in a Critical Domain of NS5A Correlate with Hepatocellular Carcinoma in Cirrhotic Patients Infected with HCV Genotype 1b
Source: MDPI journal article supplement (doi:10.3390/v13050743), 2021-04-23
Supplement: s1 [file s1]

**Table S1. Impact of NS5A Mutations associated with HCC on protein stability and their localization.**

| #  | Mutation     | $\Delta\Delta G^a$ | Location in NS5A |            | Interacting Protein/Nucleic Acid      |
|----|--------------|--------------------|------------------|------------|---------------------------------------|
| 1  | S3T          | -0.36              | Alpha-helix      | N-terminal | p53, p85-PI3K, $\beta$ -catenin       |
| 2  | <b>C13S</b>  | <b>-1.86</b>       |                  |            |                                       |
| 3  | <b>C13R</b>  | <b>-1.74</b>       |                  |            |                                       |
| 4  | T122M        | 0.06               | Beta-sheet       | Domain-1   | NS5B, p53, p85-PI3K, $\beta$ -catenin |
| 5  | F127L        | -0.43              |                  |            |                                       |
| 6  | <b>F127S</b> | <b>-1.08</b>       |                  |            |                                       |
| 7  | M133I        | -0.31              |                  |            |                                       |
| 8  | N137D        | 0.54               | Coil-turn        |            |                                       |
| 9  | N137K        | 0.16               |                  |            |                                       |
| 10 | Q181E        | 0.62               | Beta-sheet       |            | Viral RNA genome                      |
| 11 | Q181G        | 0.52               |                  |            |                                       |
| 12 | Q181H        | 0.53               |                  |            |                                       |
| 13 | Q181P        | 0.22               |                  |            |                                       |

<sup>a</sup>  $\Delta\Delta G$  (kcal/ mol) = ( $\Delta G$  wt fold -  $\Delta G$  mutant fold) was calculated by STRUM algorithm. A negative  $\Delta\Delta G$  value indicates a decrease in protein stability.

The mutations with  $\Delta\Delta G < -1.0$ , indicating a relevant decrease in protein stability is reported in bold
