# Supplementary material for: Genetic Determinants in a Critical Domain of NS5A Correlate with Hepatocellular Carcinoma in Cirrhotic Patients Infected with HCV Genotype 1b
Source: MDPI journal article supplement (doi:10.3390/v13050743), 2021-04-23
Supplement: s1 [file s1]

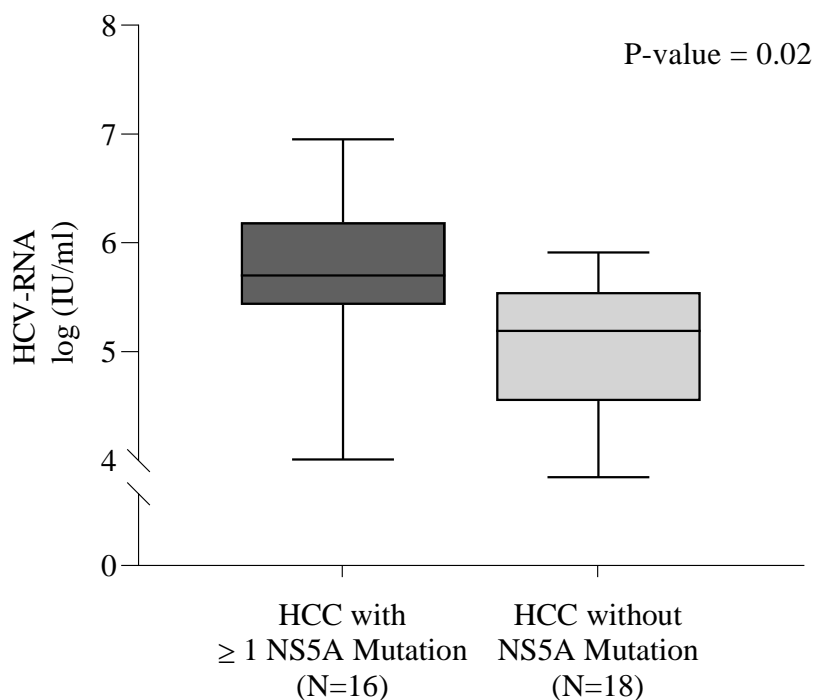

**Figure S1. Association of NS5A mutations with HCV viremia.**

The boxplot reports the distribution of HCV-RNA values in HCC patients with at least one mutation associated with HCC (N=16) and in HCC patients without these mutations (N=18). Statistically significant difference was assessed by using Mann-Whitney test.
